# Supplementary material for: Kisameet Glacial Clay: an Unexpected Source of Bacterial Diversity
Source: PubMed Central journal article supplement (PMC5442455; doi:10.1128/mbio.00590-17), 2017-05-23

Activity vs. *E. coli* MG1655

[Fold reduction in CFU/mL at 24 h]

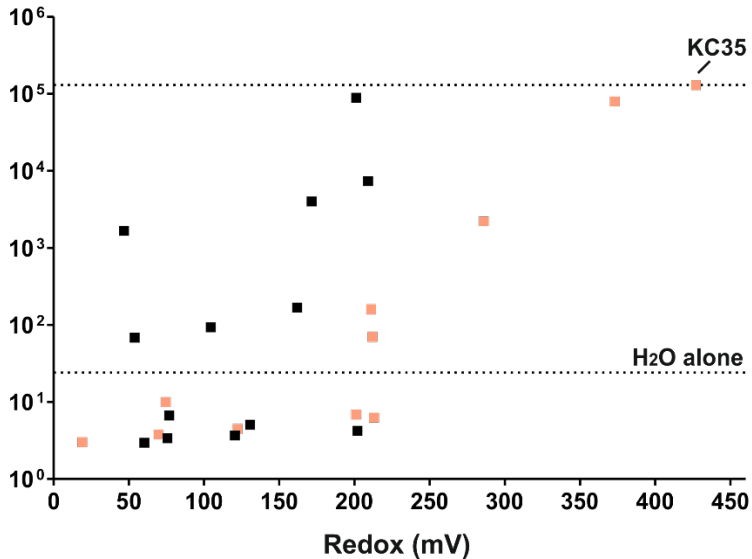

Supplement: mbo003173310sf3.pdf [file mbo003173310sf3.pdf]
